# Supplementary material for: Maternal overnutrition programs hedonic and metabolic phenotypes across generations through sperm tsRNAs
Source: PubMed Central journal article supplement — Proc Natl Acad Sci U S A. 2019 May 6;116(21):10547–56. doi: 10.1073/pnas.1820810116 (PMC6534971; doi:10.1073/pnas.1820810116), 2019-05-06
Supplement: pnas.1820810116.sapp.pdf [file pnas.1820810116.sapp.pdf]

1 **Supporting Information**

2 **Maternal overnutrition programs hedonic and metabolic phenotypes across**  
3 **generations through sperm tsRNAs**

4

5 **Authors**

6 <sup>1</sup>Gitalee Sarker, <sup>1</sup>Wenfei Sun, <sup>2</sup>David Rosenkranz, <sup>3</sup>Pawel Pelczar, <sup>4</sup>Lennart Opitz, <sup>1</sup>Vissarion Efthymiou,  
7 <sup>1</sup>Christian Wolfrum, <sup>1\*</sup>Daria Peleg-Raibstein

8

9 **Affiliations**

10 <sup>1</sup>Laboratory of Translational Nutrition Biology, Department of Health Sciences and Technology, ETH  
11 Zurich, Schwerzenbach, 8603 Switzerland.

12 <sup>2</sup>Institute of Anthropology, Johannes Gutenberg University Mainz, 55099 Mainz, Germany.

13 <sup>3</sup>Center for Transgenic Models, University of Basel, Basel, Switzerland.

14 <sup>4</sup>Functional Genomics Center Zurich, ETH Zurich, Switzerland.

15

16

17 \*Correspondence to: [daria-peleg@ethz.ch](mailto:daria-peleg@ethz.ch)

## 18 **Methods**

### 19 **Mice**

20 Male and female C57BL/6N mice were purchased from Charles River (Charles River, Germany) at the age  
21 of 10 weeks and were housed in cages at temperature of  $21 \pm 1$  °C and humidity of  $55 \pm 5\%$ . All mice were  
22 given standard chow (Kliba 3430) and water ad libitum and were maintained on 12:12h reversed light–  
23 dark cycle with lights on at 7.00 pm. All animal experiments and procedures were approved by the Zurich  
24 Cantonal Veterinarian's Office, Switzerland.

25

### 26 **Feeding and breeding design**

27 To generate F1 offspring, 40 female mice (F0) were randomly divided into two groups (20 in each group)  
28 to receive either a HFD (60% energy from fat, Diet Kliba 2127, energy content = 22 kJ/g, protein (w/w):  
29 26%, carbohydrates: 1%, fat: 38%) or a standard chow diet (Kliba 3430, energy content = 13 kJ/g, protein  
30 (w/w): 21%, carbohydrates: 39.8%, fat: 5%) for a total duration of 9 weeks (3 weeks prior to conception,  
31 3 weeks gestation and 3 weeks lactation). The shorter duration of HFD exposure led the mother not to  
32 develop any obesogenic phenotypes as well as any alteration in maternal behavior during gestation and  
33 lactation (1). The 20 male breeders (F0) kept on standard chow diet were randomly chosen and allocated  
34 as one male per 2 female breeders during the mating. The males were removed from the mating cage  
35 once the pregnancy was confirmed by vaginal copulation plug assessment to exclude paternal effect.  
36 Upon weaning at postnatal day 21, F1 offspring were housed as four littermates of same sex per cage and  
37 were provided with chow diet and water ad libitum throughout their life.

### 38 **Sperm collection, RNA extraction, small RNAs isolation and sperm RNAs microinjection**

#### 39 **Sperm isolation**

40 Total sperm RNAs or separated RNA fractions (tsRNA, tRNA and T40 RNA) were adjusted to a  
41 concentration of 2ng/ul and was microinjected individually into the male pronuclei of fertilized mouse  
42 oocytes until 20-30% distension of the organelle was observed. Embryos that survived the microinjection  
43 were transferred on the same day into the oviducts of pseudopregnant females that had been mated with  
44 sterile vasectomized males (1) the day before embryo transfer. Pregnant females delivered and raised  
45 their pups until weaning. To collect purified motile sperm, we followed 'Swim-up' purification method as  
46 described elsewhere (2). Mature sperm was isolated from cauda epididymis of F1 male mice (N = Total  
47 RNA, 8 HFD and 8 CTR; sncRNAs, 12 HFD and 12 CTR). After careful removal of the both epididymis and  
48 vas deferens with the least amount of fat attached, the membrane of cauda epididymis was punched and  
49 squeezed to press out the sperm mass. The sperm mass was then collected in M2 medium (Sigma Aldrich,  
50 M7167) and incubated for 1h at 37°C to capacitate the sperm, after which the upper 2/3<sup>rd</sup> of the fluid was  
51 collected to eliminate somatic cell contamination. Purity of the supernatant was confirmed by observing  
52 the live motile sperm under a light microscope. Finally, the sperm was pelleted by centrifugation at 10000  
53 rpm at 4°C for 10 minutes and stored at -80°C.

#### 54 **RNA extraction**

55 Total RNA from sperm sample was extracted using the Trizol-chloroform method (Invitrogen, CA, USA)  
56 according to the manufacturer's instruction. The sperm pellet was suspended in Trizol reagent, treated  
57 with chloroform, homogenated, after which the upper aqueous solution containing RNA was carefully

58 collected. The RNA sample was then treated with DNase (Biolabs INC, CA, USA) for 30 min at 37°C to  
59 exclude any DNA contamination. The final RNA pellet was suspended in 20ul RNase free water and stored  
60 at -80°C.

### 61 **Sperm small RNAs isolation**

62 Isolated sperm total RNA was dissolved in denaturing RNA loading buffer and heated 65°C for 5 min before  
63 loading into the gel. 10-15 ug of total RNA was loaded on a vertical 6% TBE gel with 19:1 acrylamide: bis-  
64 acrylamide, 8M urea, 1× TBE buffer and was run at 15 W to ensure optimal temperature (~60°C) for  
65 sample denaturation. Prior to loading the samples, the gel was pre-run for 45 min. The approximate  
66 location of the desired RNA fractions was determined by the position of small RNA markers (NEB) which  
67 were visualized by illuminating the gel with long wave UV light on a fluorescent indicator plate. Each RNA  
68 fragment was excised together with a gel slice and placed separately in the RNA elution buffer (20 mM  
69 Tris-HCl (pH 7.5), 300 mM sodium acetate, 2 mM EDTA, 0.25% SDS). The elution was carried out overnight  
70 at room temperature. In the purification step, the eluted sample was collected in a fresh tube and the  
71 RNA was precipitated with 3 volumes of 96% ethanol. The pellet was then washed with 70% ethanol and  
72 dissolved directly in 30ul of RNA injection buffer (1mM Tris-Cl, pH7.5, 0.1mM EDTA).

### 73 **Zygotes and early embryo collection**

74 C57BL/6J female mice aged 4 week underwent ovulation induction by intraperitoneal injection (i.p.) of 5  
75 IU equine chorionic gonadotrophin (PMSG; Folligon–InterVet), followed by i.p. injection of 5 IU human  
76 chorionic gonadotropin (hCG; Pregnyl–Essex Chemie) 48 h later. For the recovery of zygotes, C57BL/6J  
77 females were mated with males of the same strain immediately after the administration of hCG. All  
78 zygotes were collected from oviducts 24 h after the hCG injection, and were then freed from any  
79 remaining cumulus cells by a 1–2 min treatment of 0.1% hyaluronidase (Sigma-Aldrich) dissolved in M2  
80 medium. Mouse embryos were cultured in M16 (Sigma-Aldrich) medium at 37°C and 5% CO<sub>2</sub>. For  
81 micromanipulation, embryos were then transferred into M2 medium.

### 82 **Sperm RNAs microinjection and embryo transfer**

83 All microinjections were performed using a microinjection system comprised of an inverted microscope  
84 equipped with Nomarski optics (Nikon), a set of micromanipulators (Narashige), and a FemtoJet  
85 microinjection unit (Eppendorf). Total sperm RNAs or separated RNA fractions (tsRNA, tRNA and T40 RNA)  
86 were adjusted to a concentration of 2ng/ul and was microinjected individually into the male pronuclei of  
87 fertilized mouse oocytes until 20-30% distension of the organelle was observed. Embryos that survived  
88 the microinjection were transferred on the same day into the oviducts of 8–16-wk-old pseudopregnant  
89 Crl:CD1 (ICR) females (0.5 d used after coitus) that had been mated with sterile genetically vasectomized  
90 males (1) the day before embryo transfer. Pregnant females were allowed to deliver and raise their pups  
91 until weaning age.

### 92 **Small RNA library preparation and sequencing**

93 The small sperm RNA fraction with nucleotide length of 30-40nt was isolated for RNA sequencing. Small  
94 RNA libraries were constructed according to TruSeq Small RNA Sample Preparation Kit (Illumina), the small  
95 RNA libraries were followed by library quality validation for sequencing. Sequencing is performed by the  
96 Function Genomic Center Zurich.

## 97 **Small RNA-seq data processing and analysis**

98 Initial data processing was conducted using a series of Perl scripts (in brackets) which are part of the NGS  
99 TOOLBOX (3). Adapter sequences were trimmed from raw sequence reads searching for TGG AATTCTC(N)<sub>x</sub>-  
100 3' motifs (clip). Sequence reads <16 nt were removed (length-filter) and datasets were collapsed to non-  
101 identical sequences while keeping information on sequence read counts (collapse). Low-complexity  
102 sequences were removed (duster) and the remaining sequences were mapped to the mouse genome  
103 (GRCm38p6) with bowtie [v.1.2, (4)] using default settings. Mapped sequences were annotated with  
104 unitas [v.1.5.0, -skip\_dust, (5)], which was also used to detect differentially expressed sRNA sequences  
105 between CTL (n=3) and HFD (n=3) with Bonferroni-Holm correction of alpha error.

## 106 **tsRNA target prediction**

107 Based on their association with PIWI proteins (6, 7), we predicted tsRNA target transcripts applying  
108 targeting rules recently described for piRNAs (8) which are more strict compared to the commonly applied  
109 miRNA targeting rules. We run miRanda (9) with mouse cDNA data from Ensembl database (release 90)  
110 and subsequently considered alignments which are in compliance with the criteria defined by Zhang and  
111 colleagues using the Perl script miRanda\_wrapper which is freely available at  
112 <https://sourceforge.net/projects/piranha-targetprediction/>. Having identified putative targets of the  
113 differentially expressed tsRNAs we assigned a score value to each target which describes the difference  
114 in the number of molecules (measured in reads per million) targeting the transcript in HFD and CTL  
115 condition. Positive score values imply a higher number of targeting tsRNA molecules in HFD compared to  
116 CTL, which should result in downregulation of the corresponding transcript in HFD. The opposite is true  
117 for negative score values. The absolute value of the score can be used as a proxy for the likelihood that  
118 expression of the corresponding target is affected by differentially expressed tsRNAs.

## 119 **Experimental design**

120 All the experiments were conducted when the mice reached adulthood (PND 70-110). HFD preference  
121 test, sucrose preference test and alcohol preference test were conducted chronologically with the same  
122 set of animals from each experimental group with the wash time period of at least 7 days in between  
123 tests. For the amphetamine sensitivity test, a separate set of mice was selected from each group and sex.  
124 To assess the metabolic parameters, a separate set of behaviorally naïve mice from each group was  
125 allocated. For junk food choice test, a new set of behaviorally naïve mice from HFD and control tsRNA  
126 groups were selected. The metabolic experiments were conducted in following orders: CT scan, insulin  
127 sensitivity test, metabolic cage study, plasma insulin and lipid profiles measurement. For gene expression  
128 analysis by qRT-PCR, samples were collected from a separate set of behaviorally naïve mice from each  
129 group. The sample size for each experiment was included in the figure legends and also summarized in  
130 the supplementary tables **S2-S4**.

131

## 132 **Behavioral experiments**

### 133 **HFD preference**

134 During the test, mice were single housed to enable the measurement of food intake. Mice received free  
135 access to laboratory chow and HFD for 3 hours with ad libitum water. The test was conducted for 4  
136 consecutive days. The weight of each type of food was measured before and after testing. Body weight

137 was recorded daily. The intake of chow and HFD was calculated as an amount of each food consumption  
138 in mg per gram body weight. The average consumption during the last 3 days was used to analyze the  
139 food preference.

#### 140 **Sucrose preference**

141 The preference test was carried out in the animal home cage. The mice were presented with 2  
142 polypropylene tubes (15ml; Sarstedt, Germany). One tube contained plain drinking water and the second  
143 one contained sucrose solution. Prior to the test, mice were caged individually and had free access to ad  
144 libitum food. Mice were habituated to drink from both tubes containing water for 2 days. On day 3, one  
145 of the drinking tubes was filled with sucrose solution and the other one with water for a period of 9 days.  
146 Three different concentrations of sucrose (0.5%, 1% and 3%) were tested and gradually increased every  
147 3rd day. The position of the bottles was changed daily to exclude positional effects. The intake of water  
148 and sucrose solution as well as body weight were measured daily. Sucrose and water consumption was  
149 calculated as total sucrose or water consumption in mg per gram body weight per day and averaged over  
150 the 3 days intake for each concentration.

#### 151 **Alcohol preference**

152 The same protocol was used as for the sucrose preference test. After the habituation period, mice were  
153 given a choice to drink from two tubes- one containing water and the other containing either 2%, 5% or  
154 8% ethanol. The mice were exposed to each concentration of ethanol in ascending order for 3 days. The  
155 water and ethanol consumption as well as body weight were measured daily. The consumption was  
156 calculated as total alcohol consumed in mg per gram body weight and averaged over the 3 days intake for  
157 each concentration.

#### 158 **Amphetamine sensitivity**

159 The test was conducted in the open field paradigm. The test apparatus consisted of four square shaped  
160 arenas (40cm×40 cm×35cm), made from grey colored plastic laminated wood. A digital camera was  
161 mounted on top of the apparatus to capture images at a rate of 5Hz which were processed by the  
162 Ethovision software (Noldus, Wagening, Nenederlands). At the beginning, basal locomotor activity was  
163 recorded for 30 min. The mice were then briefly removed and injected with 0.9% NaCl solution  
164 (intraperitoneal; i.p) and tested for another 30 min. Following that, mice received an i.p injection of d-  
165 amphetamine sulfate (2.5mg/kg body weight dissolved in 0.9% NaCl; i.p). The locomotion was tested for  
166 2h after the drug challenge. Data were indexed by the distance travelled in the entire arena and summed  
167 for each successive 10 min bins.

168

#### 169 **Metabolic phenotype**

##### 170 **Body weight**

171 Body weights of each offspring were measured weekly from post-natal week 3 up to post-natal week 11  
172 with an electronic scale (Mettler PM 2000).

##### 173 **Insulin tolerance test (ITT)**

174 The mice were fasted for 6 hours before the experiment. During the test, an i.p injection of insulin  
175 (Actrapid; Novo Nordisk A/S) at a dose of 0.75 unit/kg body weight for chow treated males, 2 unit/kg body

176 weight for junk treated males, 0.65 unit/kg body weight for chow treated females and 0.85 unit/kg body  
177 weight for junk treated females was administered. Blood glucose was measured before (0 min) and 15,  
178 30, 60, 90 and 120 min after the insulin challenge using Accu-Chek Aviva device (Roche).

### 179 **Fat distribution assay**

180 The distribution of body fat was measured using a computed tomography (CT) X-ray scanner (La Theta  
181 LCT-100; Aloka Inc, Japan). The scanner consisted of a cylindrical view of 48 mm by 41 mm with a pixel  
182 resolution of 100  $\mu\text{m}$  on 480  $\times$  480 pixel images. The X-ray source was set at 50 kV with a constant 1mA  
183 current. Anesthetized mice were laid on supine position in on the transparent mouse holder with the  
184 caudal end held towards the CT and the rostral end towards the anesthetic tube where the gas anesthesia  
185 was maintained with 1.5% - 2.5% isoflurane. The scan area was set based on sagittal pre-scan and fixed  
186 anatomical landmarks. A whole body scan excluding the head and tail was performed at a rate of 4.5  
187 s/image for 5 min. The images were analyzed using the La Theta 2.10 software.

### 188 **Metabolic cage study**

189 TSE Phenomaster cages (TSE Systems GmbH, Bad Homburg, Germany) were used for the measurement of  
190 energy expenditure. Mice were single housed for 2 days prior to the experiment for acclimatization to the  
191 new cage environment. Mice were individually placed in the Phenomaster metabolic cage unit for a total  
192 of 3 days. The temperature was set to 23  $^{\circ}\text{C}$  and the reversed light/dark cycle 12:12 h (lights off at 07:00  
193 and lights on at 19:00) was maintained throughout the experiment. Mice had food and water ad libitum.  
194  $\text{O}_2$  consumption and  $\text{CO}_2$  production were calculated from the gas concentrations and the air flow through  
195 the individual cage measured in parallel. Heat production, locomotor activity and food intake were also  
196 monitored during this period. Data were analyzed with Phenomaster software.  $\text{O}_2$  consumption,  $\text{CO}_2$   
197 production and heat production was normalized to lean body mass.

### 198 **Plasma parameters measurement**

199 Plasma sample was collected from 6h fasted mice. Plasma insulin and leptin were measured using  
200 commercially available ELISA kits designed for mouse (Mouse Insulin ELISA Kit, Crystal Chem, USA; Murine  
201 Leptin ELISA Kit, Invitrogen). Plasma cholesterol (Roche, Switzerland), triacylglycerol (Hitachi, Switzerland)  
202 and non-esterified fatty acids (Wako, Germany) were analyzed colorimetric assay.

### 203 **Junk food choice test**

204 In the junk food preference test, five weeks old HFD-tsRNA and CTR-tsRNA offspring were given free  
205 access to HFD and 1% sucrose solution together with regular chow and water for a duration of 12 weeks.  
206 On the starting day, the body weight of the mice was measured (week 0). The control groups received  
207 equivalent amount of chow and two bottles of water for the same duration. Body weight and consumption  
208 of junk foods, chow and water were measured every week. At the end of the experiment, distribution of  
209 fat, insulin sensitivity, energy expenditure and plasma parameters were evaluated.

### 210 **Dissection of brain regions**

211 Adult F1 father and tsRNA offspring from both HFD and CTR groups were euthanized, the brains were  
212 rapidly isolated, and 1 mm thick coronal sections were made. The slices were placed on an ice-chilled  
213 dissection plate for the extraction of the brain regions using a 1 mm micropunch. All brain areas of interest

214 were dissected according to the Mouse Brain Atlas in Stereotaxic Coordinates (Paxinos and Franklin, 2008)  
 215 which were as follows: dorsal striatum (bregma +1.34 to +0.14 mm), nucleus accumbens (bregma +1.60  
 216 to +0.98 mm) and ventral tegmental area (bregma -2.92 to -3.64 mm) and immediately frozen at -80°C.

### 217 Gene expression analysis

218 Total RNA from brain tissue was extracted using the Trizol-chloroform method (Invitrogen, CA, USA)  
 219 according to the manufacturer's instruction and treated with DNase (Biolabs INC, CA, USA) for 30 min at  
 220 37°C to exclude any DNA contamination. Following RNA extraction, 1µg of total RNA was converted to  
 221 cDNA using High Capacity cDNA Reverse Transcription Kit [Applied Biosystems (ABI), Foster City, CA)]. The  
 222 RT-qPCR reactions were performed using the SYBER Green master mix (ABI) in the presence of specific  
 223 primer pairs on an Applied Biosystems ViiA™ 7 RT-qPCR system. Data for tissue samples were normalized  
 224 to Endogenous control m36B4. RT-qPCR reactions were conducted as follows: after a pre-denaturation  
 225 and polymerase-activation program (5min at 95°C), 40 cycles each consisting of 95°C for 3 sec and 60°C  
 226 for 30 sec were followed by a melting curve program (60 to 95°C with heating rate of 0.1°C/sec). The  
 227 relative expression of mRNA was calculated using the 2- ΔΔCt method. All primers were purchased from  
 228 Microsynth AG, Switzerland. The primers are listed in **Supplementary Table 1**.

### 229 Supplementary Table 1

| Gene Name | Primer Forwar (5'-3') | Primer Reverse (5'-3')  |
|-----------|-----------------------|-------------------------|
| ZCCHC11   | AACATGCACCACGCCATTC   | GTGGCACATCTGTCTGCTTG    |
| CHRNA2    | TGCTGACTCTTCGGTGAAGG  | TCCCCAGGAAGCAGACGATA    |
| DHRS3     | TGCACGTCAAAGCATCAGC   | GGTTGGGAAACCTGACTCTCA   |
| VAV3      | AAAAGATTTCTGACGGCGGC  | TGCCATAAATAACCAATCTTTCC |
| EEFA1     | ATATAAGTGCAGCAGTCGCC  | CACAACACCTGCGTTCTGA     |
| DAB2IP    | CATGAACGCGCAGTTGTTAGA | CTGCCAGATCCTTTTCTGCTTG  |
| GRIN3A    | ACGTGTGGAAAAGAGCAGATG | CGTTGGTTGTCGTGACTCAG    |
| m36B4     | GCCGTGATGCCAGGGAAGA   | CATCTGCTTGAGCCCCACGTT   |

230  
 231 **Table S1:** Summary of the primers used for gene expression analysis in brain.

### 232 Protein extraction and Western blot

233 dSTR (dorsal striatum), VTA (ventral tegmental area) and Nac (nucleus accumbens) tissues were  
 234 homogenized in RIPA buffer (50mM Tris pH 7.4, 150mM NaCl, 2mM EDTA, 1.0% Triton X100, 0.5% sodium  
 235 deoxycholate) supplemented with protease (Complete, Roche) and phosphatase (Halt phosphatase  
 236 inhibitor cocktail, Thermo Fisher) inhibitor cocktails. Lysates were cleared by centrifugation at 12,000g for  
 237 15 minutes at 40C. Protein concentration of the supernatants was determined by BCA Protein Assay  
 238 (ThermoScientific). Western Blotting was carried out following standard procedures. Equal amount of  
 239 proteins (60 µg) were separated on 12% SDS-polyacrylamide gel, transferred to a nitrocellulose  
 240 membrane via wet transfer in mini gel transfer chambers (Bio-Rad) and blotted for CHRNA2 (1:500, Sigma)

241 and GAPDH (1:1000 Cell Signaling). Signal of the HRP-conjugated secondary antibodies (Cell Signaling) was  
242 visualized by the LAS 4000 mini Image Quant system (GE Healthcare Life Sciences).

243

#### 244 **Statistical analysis:**

245 Statistical analysis was performed using the StatView software (version 5.0). Analysis of variance (ANOVA)  
246 followed by *post-hoc* comparisons (Fisher's least significant difference) or factorial ANOVA was applied  
247 whenever appropriate. For the weekly body weight measurement, a  $2 \times 2 \times 5$  (group  $\times$  sex  $\times$  weeks)  
248 repeated measure ANOVA in the total RNA group, a  $2 \times 2 \times 9$  (group  $\times$  sex  $\times$  weeks) repeated measure  
249 ANOVA in the sncRNA groups and a  $2 \times 2 \times 12$  (group  $\times$  sex  $\times$  weeks) repeated measure ANOVA in the junk  
250 challenged tsRNA groups were employed. To analyze the preference for HFD a  $2 \times 2 \times 2$  (group  $\times$  sex  $\times$   
251 food) ANOVA was used. For the sucrose and alcohol preference tests, a  $2 \times 2 \times 2 \times 3$  (group  $\times$  sex  $\times$   
252 preference substance  $\times$  substance concentrations) repeated-measure ANOVA was used. The locomotion  
253 during the baseline and saline phases prior to the amphetamine challenge was subjected to a  $2 \times 2 \times 3$   
254 (group  $\times$  sex  $\times$  10-min bins) repeated-measure ANOVA. Amphetamine induced locomotor activity was  
255 subjected to a  $2 \times 2 \times 12$  (group  $\times$  sex  $\times$  10-min bins) repeated-measure ANOVA. To analyze the insulin  
256 sensitivity, a  $2 \times 2 \times 5$  (group  $\times$  sex  $\times$  time) repeated measure ANOVA was conducted. In the junk food  
257 choice test, a  $2 \times 2 \times 2 \times 12$  (group  $\times$  sex  $\times$  preference substance  $\times$  weeks) repeated-measure ANOVA was  
258 used. Two-tailed Student t-test was used to analyze the differences in gene expression in different brain  
259 tissue. Statistical significance was set at  $P < 0.05$ . All data were presented as means  $\pm$  standard error of  
260 mean (SEM). In the behavioral, metabolic and molecular tests, no difference was detected in the variance  
261 between the HFD and CTR-RNA injected groups ( $F > 1$ ).



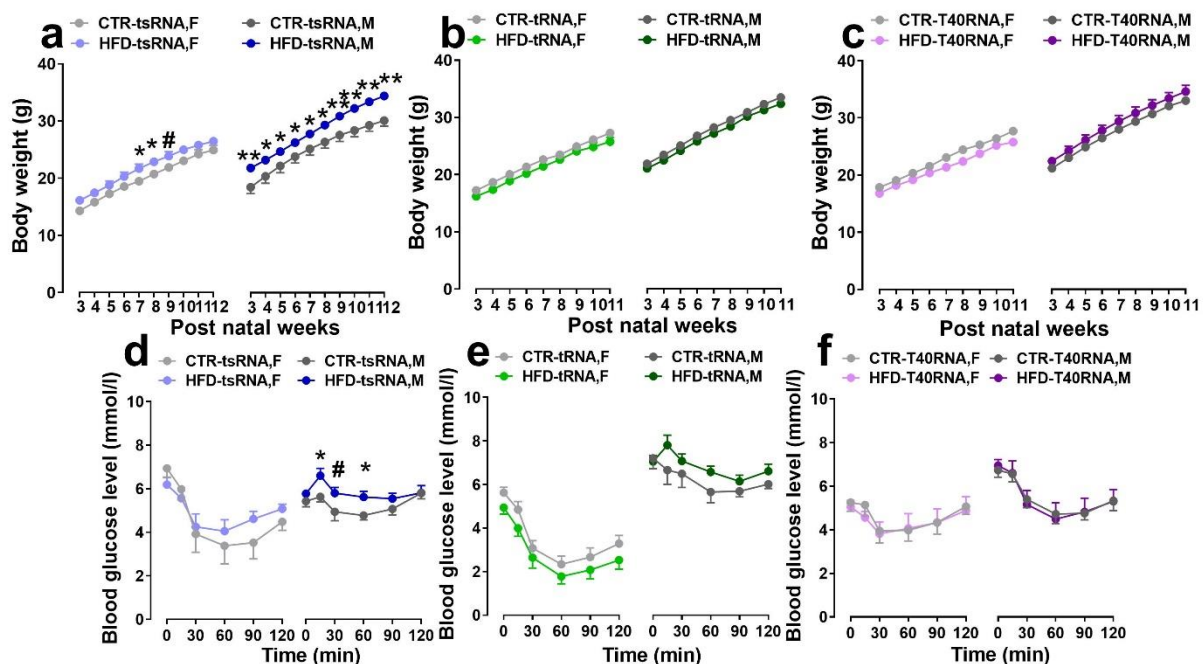

264 **Supplementary Figure 1. Altered metabolic phenotypes in sperm RNA fragments injected offspring.** Body weight: (a) HFD-tsRNA offspring  
 265 gained more weight as compared to the CTR-tsRNA offspring. N (CTR-tsRNA) = 16 (8 M, 8 F); N (HFD-tsRNA) = 20 (10M, 10 F). (b) No difference  
 266 was detected in body weight between the HFD-tRNA and CTR-tRNA offspring. N (CTR-tRNA) = 23 (12 M, 11 F); N (HFD-tRNA) = 20 (11 M, 9 F). (c)  
 267 Offspring from HFD-T40RNA group did not show any difference in body weight compared to the CTR-T40RNA group. N (CTR-T40RNA) = 23 (15 M,  
 268 8 F); N (HFD-T40RNA) = 18 (10 M, 8 F). Insulin tolerance test: (d) HFD-tsRNA offspring showed significantly higher blood glucose level following  
 269 an i.p insulin injection, indicating impaired insulin sensitivity in this group. A stronger impairment of insulin sensitivity was depicted in the male  
 270 HFD-tsRNA offspring. N (CTR-tsRNA) = 14 (7 M, 7 F); N (HFD-tsRNA) = 19 (11 M, 8 F). (e) HFD-tRNA offspring did not show any difference in insulin  
 271 sensitivity compared to the CTR-tRNA offspring. N = (8 M, 8 F) per group. (f) The insulin sensitivity of HFD-T40RNA offspring was comparable to  
 272 that of CTR-T40RNA offspring. N = (8 M, 8 F) per group. Data are represented as mean  $\pm$  SEM. \* P < 0.05, \*\* P < 0.01, \*\*\* P < 0.001. CTR = control,  
 273 HFD = high fat diet, M = male, F = female.

275 **Figure S2**

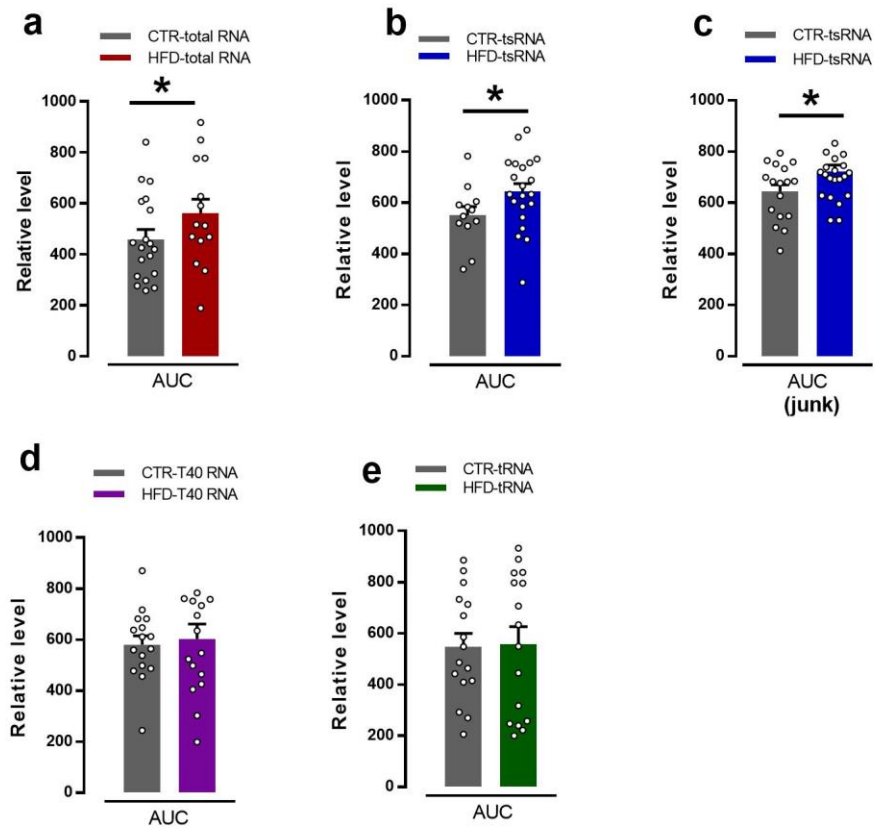

276  
277 **Supplementary Figure 2. Area under curve (AUC) analysis of ITT data in different groups.** The bar graph shows the comparison of AUC between  
278 HFD and CTR groups for figure 3(b), 6 (d), 7(c), 6(f) and 6(e) respectively. Data are represented as mean  $\pm$  SEM. \* P < 0.05.

279

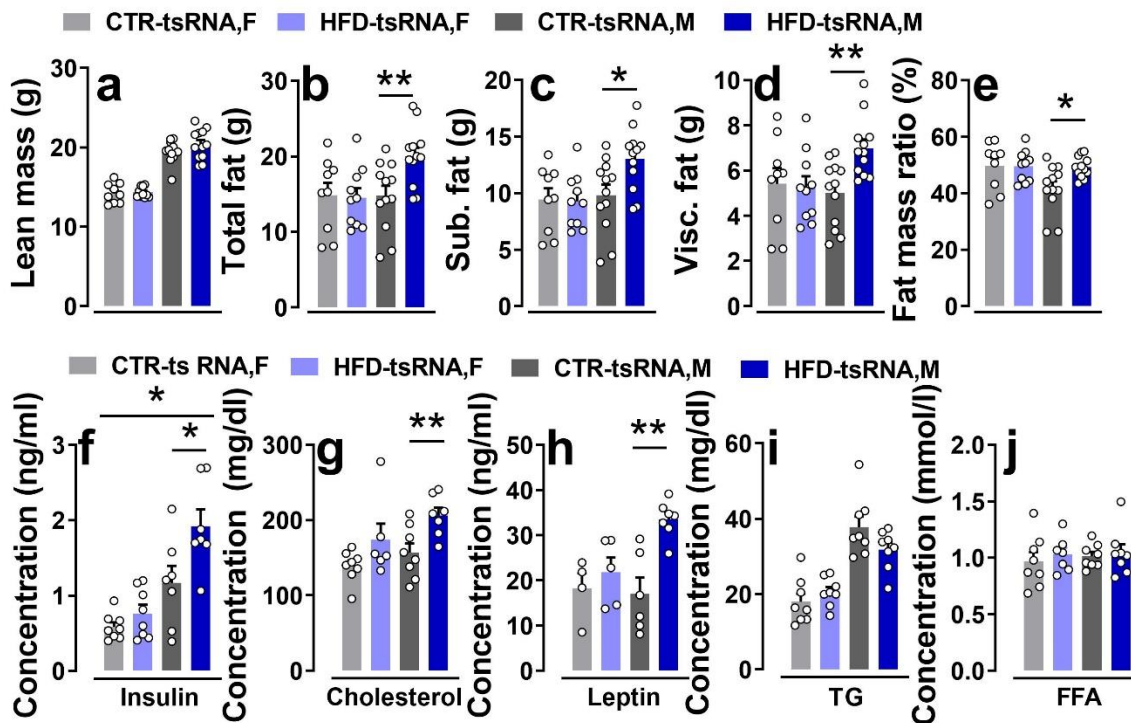

281  
 282 **Supplementary Figure 3. Metabolic parameters of tsRNA offspring in junk food choice test .** (a-e) Fat Distribution : Male HFD-tsRNA offspring  
 283 developed a marked increase in total fat, subcutaneous fat, visceral fat as well as fat mass ratio compared to their CTR-littermates. No difference  
 284 was observed in total lean mass between the groups. N (CTR-tsRNA) = 21 (12 M, 9 F); N (HFD-tsRNA) = 22 (12 M, 10 F). (f) Plasma Insulin: HFD-  
 285 tsRNA group showed increased fasted plasma insulin compared to the CTR-tsRNA offspring. Male HFD-tsRNA had higher insulin level compared  
 286 to others. N = (8M, 8F) per group. (h) Plasma leptin: HFD-tsRNA group showed higher fasted leptin level compared to CTR-tsRNA. Male HFD-tsRNA  
 287 offspring had marked increase in leptin level compared to others. N (CTR-tsRNA) = 10 (6 M, 4 F); N (HFD-tsRNA) = 12 (7 M, 5 F). (g,i-j) Lipid profile:  
 288 Male HFD-tsRNA offspring showed increased plasma cholesterol level compared to the others. N = (8M, 8F) per group. Data are represented as  
 289 mean  $\pm$  SEM. \*P < 0.05, \*\*P < 0.01, \*\*\*P < 0.001. FFA = free fatty acid, TG = triglycerides, CTR = control, HFD = high fat diet, M = male, F = female.

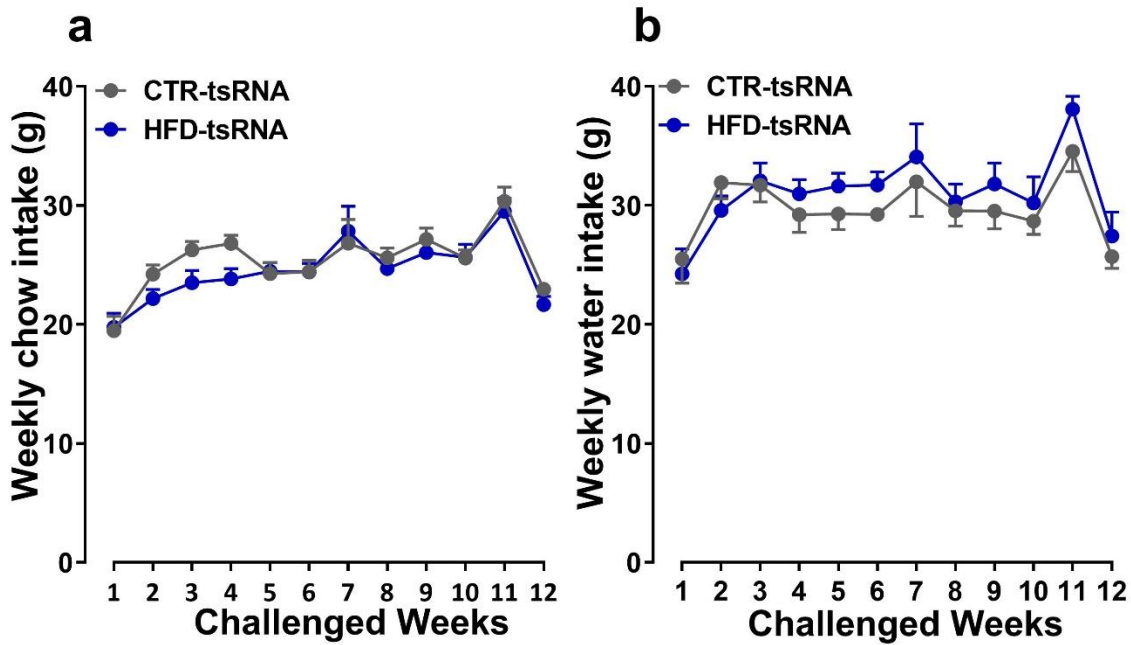

292

293 **Supplementary Figure 4:** Food and water intake in control groups during junk test: No difference in chow food intake was detected between  
 294 HFD-tsRNA and CTR-tsRNA offspring (a). Both offspring group did not differ in their water consumption (b). N (CTR-tsRNA) = 20 (10 M, 8 F); N  
 295 (HFD-tsRNA) = 23 (9 M, 8 F). Data are represented as mean ± SEM. CTR = control, HFD = high fat diet, M = male, F = female.

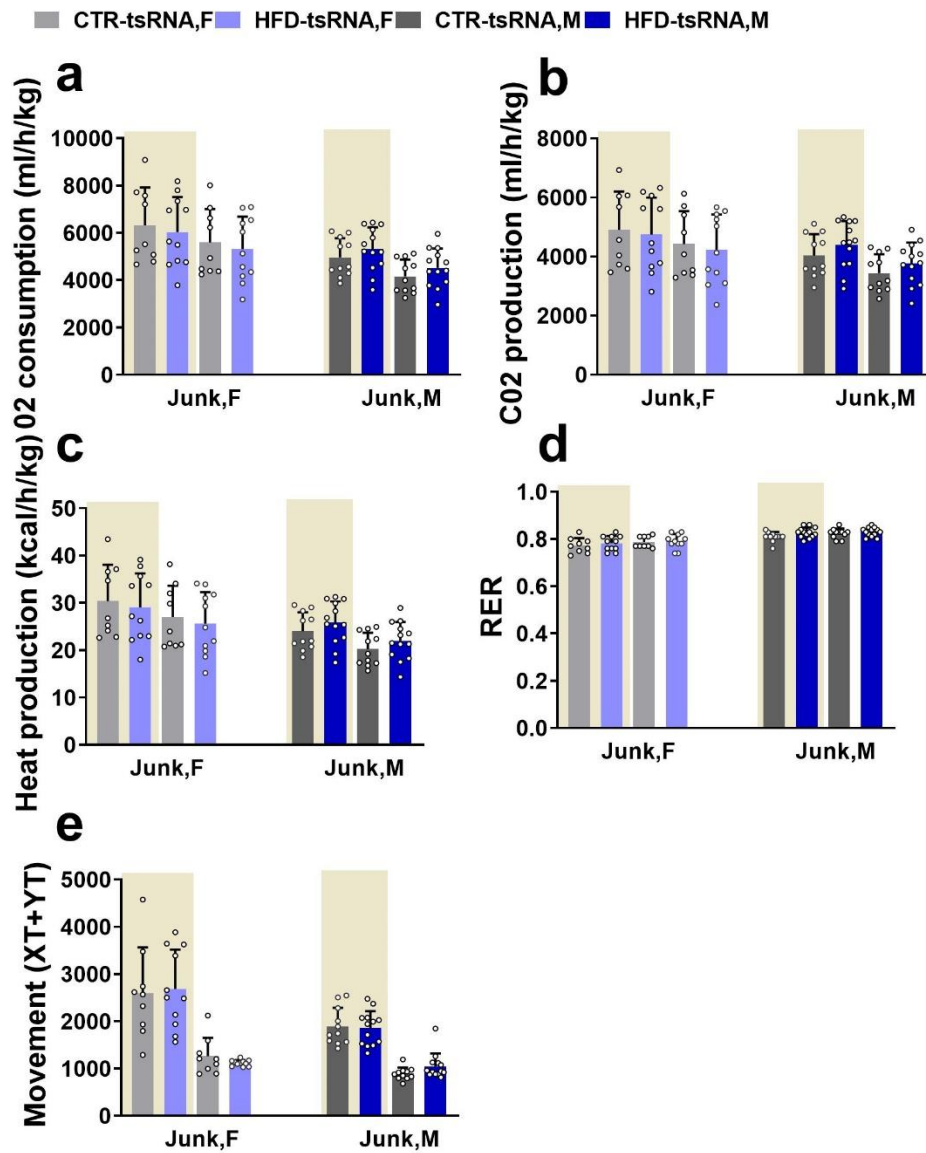

297  
298 **Supplementary Figure 5. Energy expenditure analysis in the offspring tested for junk food choice.**

299 **(a)** There was no difference in V<sub>O</sub><sub>2</sub> consumption between the HFD-tsRNA offspring and the CTR-tsRNA offspring. **(b)** No difference was observed  
300 in VCO<sub>2</sub> production between the groups. **(c)** Heat production was comparable between the groups. **(d)** No difference was detected in RER  
301 between HFD-tsRNA offspring and CTR-tsRNA offspring. **(e)** Male showed less activity than females. No difference in activity was detected  
302 between the groups. Data are represented as mean ± SEM. CTR = control, HFD = high fat diet, RER = respiratory exchange ratio, M = male, F =  
303 female.

304



317 (F1-HFD) = 6; N (CTR-tsRNA) = 12; N (HFD-tsRNA) = 12. Data are represented as mean  $\pm$  SEM. \* P < 0.05. CTR = control, HFD = high fat diet, dSTR  
318 = dorsal striatum, Nac = nucleus accumbens, VTA = ventral tegmental area.

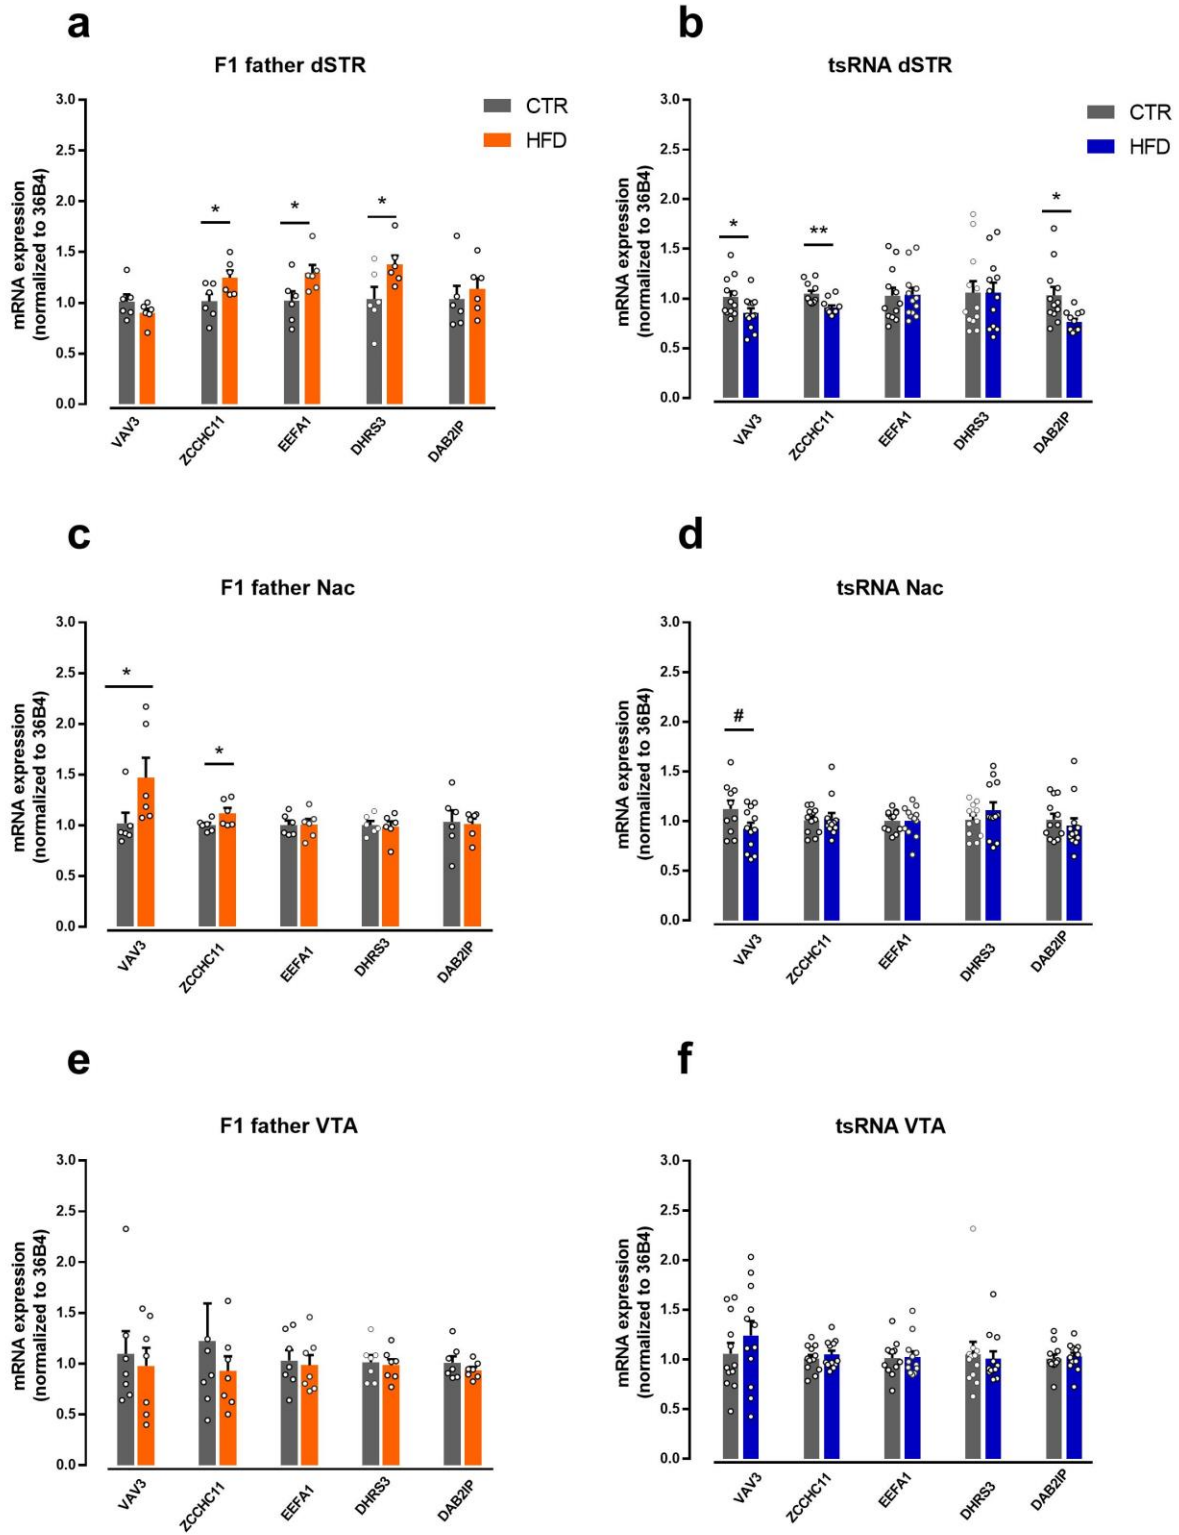



321 **Supplementary Figure 8. Expression of potential candidate genes in the dSTR, Nac and VTA.** The expression of VAV3, ZCCHC11, EEFA1, DHRS3  
 322 and DAB2IP in the dSTR, Nac and VTA of F1 and tsRNA offspring (a-f). (a) The levels of ZCCHC11, EEFA1 and DHRS3 were increased in F1-HFD  
 323 compared to F1-CTR males in the dSTR. (b) The levels of VAV3, ZCCHC11 and DAB2IP were reduced in tsRNA-HFD compared to tsRNA-CTR offspring  
 324 in the dSTR. (c) The levels of VAV3 and ZCCHC11 were increased in F1-HFD compared to F1-CTR males in the Nac. (d) The expressions of VAV3  
 325 tended to be reduced in tsRNA-HFD compared to tsRNA-CTR offspring in the Nac. (e-f) The expression of VAV3, ZCCHC11, EEFA1, DHRS3 and  
 326 DAB2IP remained unaltered in the VTA of F1-HFD and tsRNA-HFD offspring compared to the control groups. The statistical significance was  
 327 calculated using two-tailed Student t-test. N (F1-CTR) = 6; N (F1-HFD) = 6; N (CTR-tsRNA) = 12; N (HFD-tsRNA) = 12. Data are represented as mean  
 328  $\pm$  SEM. \* P < 0.05, \*\* P < 0.01. CTR = control, HFD = high fat diet, dSTR = dorsal striatum, Nac = nucleus accumbens, VTA = ventral tegmental area.

329  
 330 **Figure S9**

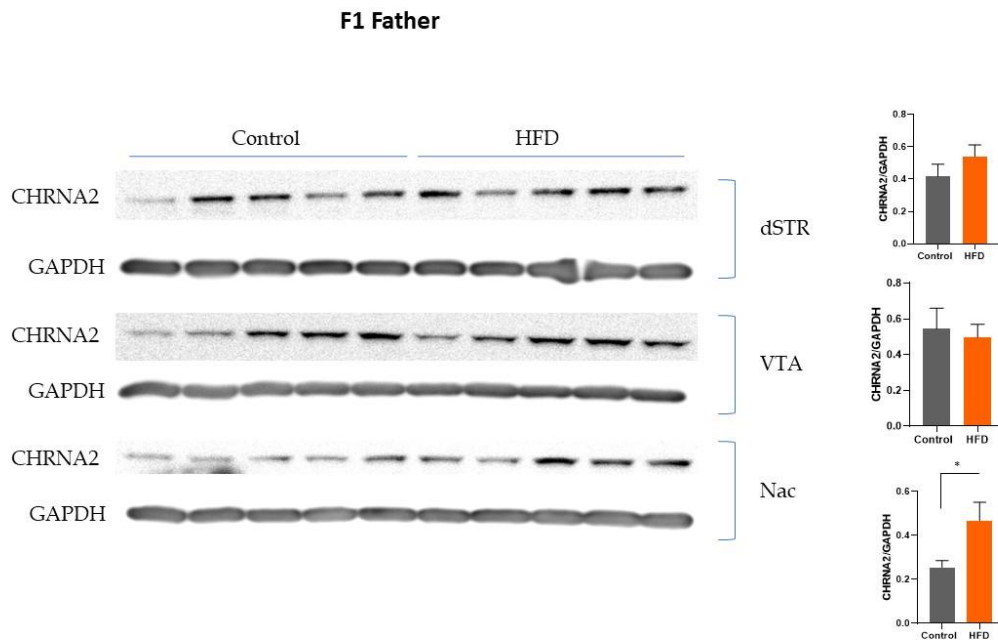

331  
 332  
 333 **Supplementary Figure 9.** Western Blots (left) and quantifications (right) of CHRNA2 in dSTR, VTA and Nac of F1 fathers that were exposed to 9  
 334 weeks maternal HFD or chow diet. dSTR: dorsal striatum, VTA: ventral tegmental area, Nac: nucleus accumbens. Quantifications are presented as  
 Mean  $\pm$  SEM. Student's t-test \* = p < 0.05

335 **Figure S10**

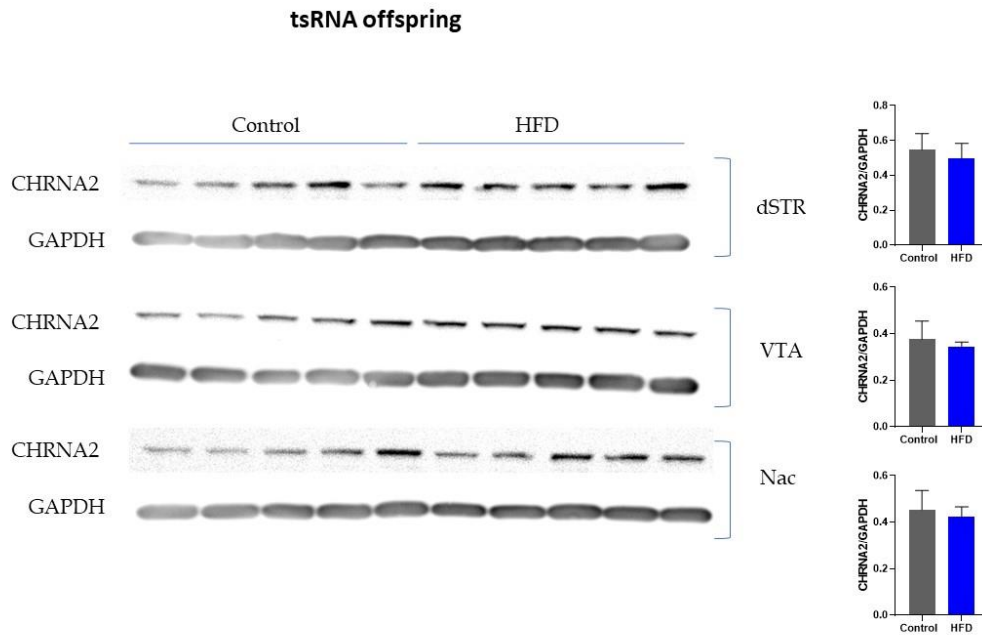

336 **Supplementary Figure 10.** Western Blots (left) and quantifications (right) of CHRNA2 in dSTR, VTA and Nac in mice born after microinjection of sperm  
 337 tsRNA from F1-HFD and F1-CTR male into naïve zygote. dSTR: dorsal striatum, VTA: ventral tegmental area, Nac: nucleus accumbens. Quantifications are  
 338 presented as Mean +/- SEM. Student's t-test \*=p<0.05.

338  
 339 **Supplementary Table 2**

| Cohorts  | Test                    | HFD-total RNA | CTR-total RNA |
|----------|-------------------------|---------------|---------------|
| Cohort 1 | 1. HFD preference       | 7 M, 9 F      | 8 M, 11 F     |
|          | 2. Sucrose preference   |               |               |
|          | 3. Alcohol preference   |               |               |
| Cohort 2 | Amphetamine sensitivity | 5 M, 5 F      | 5 M, 5 F      |
| Cohort 3 | 1. BW                   | 8 M, 10 F     | 8 M, 11 F     |
|          | 2. CT scan              | 6 M, 8 F      | 7 M, 10 F     |
|          | 3. ITT                  | 8 M, 8 F      | 8 M, 11 F     |
|          | 4. Plasma profile       | 6 M, 6F       | 6 M, 6 F      |

340  
 341 **Table S2:** Summary of the number of the offspring in each experiment and the sequence of the tests conducted in the HFD-total RNA and control-  
 342 total RNA offspring.

343

344 **Supplementary Table 3**

| Cohorts                          | Test                     | HFD-tsRNA  | CTR-tsRNA  |
|----------------------------------|--------------------------|------------|------------|
| Cohort 1                         | 1. HFD preference        | 10 M, 10 F | 10 M, 10 F |
|                                  | 2. Sucrose preference    | 10 M, 7 F  | 10 M, 9 F  |
|                                  | 3. Alcohol preference    | 9 M, 10 F  | 7 M, 6 F   |
| Cohort 2                         | Amphetamine sensitivity  | 5 M, 5 F   | 5 M, 5 F   |
| Cohort 3                         | 1. BW                    | 10 M, 10 F | 8 M, 8 F   |
|                                  | 2. ITT                   | 11 M, 8 F  | 7 M, 7 F   |
| Cohort 4 (junk food choice test) | 1. BW                    | 13 M, 10 F | 12 M, 9 F  |
|                                  | 2. CT                    | 12 M, 10 F | 12 M, 9 F  |
|                                  | 3. ITT                   | 11 M, 11 F | 9 M, 8 F   |
|                                  | 4. Metabolic cage        | 13 M, 11 F | 11 M, 9 F  |
|                                  | 5. Plasma Parameter      | 8 M, 8 F   | 8 M, 8 F   |
| Cohort 5                         | Gene expression analysis | 6 M, 6 F   | 6 M, 6 F   |

345  
 346 **Table S3:** Summary of the number of the offspring in each experiment and the sequence of the tests conducted in the HFD-tsRNA and control-  
 347 tsRNA offspring.  
 348

349 **Supplementary Table 4**

| Cohorts  | Test                    | HFD-tRNA   | CTR-tRNA   |
|----------|-------------------------|------------|------------|
| Cohort 1 | 1. HFD preference       | 8 M, 8 F   | 8 M, 8 F   |
|          | 2. Sucrose preference   |            |            |
|          | 3. Alcohol preference   |            |            |
| Cohort 2 | Amphetamine sensitivity | 5 M, 5 F   | 5 M, 5 F   |
| Cohort 3 | 1. BW                   | 11 M, 9 F  | 12 M, 11 F |
|          | 2. ITT                  | 8 M, 8 F   | 8 M, 8 F   |
| Cohorts  | Test                    | HFD-T40RNA | CTR-T40RNA |
| Cohort 1 | 1. HFD preference       | 8 M, 8 F   | 8 M, 8 F   |
|          | 2. Sucrose preference   |            |            |
|          | 3. Alcohol preference   |            |            |
| Cohort 2 | Amphetamine sensitivity | 5 M, 5 F   | 5 M, 5 F   |
| Cohort 3 | 1. BW                   | 10 M, 8 F  | 15 M, 8 F  |
|          | 2. ITT                  | 8 M, 8 F   | 8 M, 8 F   |

350

351 **Table S4:** Summary of the number of the offspring in each experiment and the sequence of the tests conducted in the HFD-tRNA and control-  
 352 tRNA offspring; HFD-T40RNA and control-T40RNA offspring.

353 **References**

- 354 1. Haueter S, *et al.* (2010) Genetic vasectomy-overexpression of Prm1-EGFP fusion protein in  
355 elongating spermatids causes dominant male sterility in mice. *Genesis (New York, N.Y. : 2000)*  
356 48(3):151-160.
- 357 2. Mortimer D (2000) Sperm preparation methods. *Journal of andrology* 21(3):357-366.
- 358 3. Rosenkranz D, *et al.* (2015) Piwi proteins and piRNAs in mammalian oocytes and early embryos:  
359 From sample to sequence. *Genomics data* 5:309-313.
- 360 4. Langmead B, Trapnell C, Pop M, & Salzberg SL (2009) Ultrafast and memory-efficient alignment of  
361 short DNA sequences to the human genome. *Genome biology* 10(3):R25.
- 362 5. Gebert D, Hewel C, & Rosenkranz D (2017) unitas: the universal tool for annotation of small RNAs.  
363 *BMC genomics* 18(1):644.
- 364 6. Keam SP, *et al.* (2014) The human Piwi protein Hiwi2 associates with tRNA-derived piRNAs in  
365 somatic cells. *Nucleic acids research* 42(14):8984-8995.
- 366 7. Honda S, *et al.* (2017) The biogenesis pathway of tRNA-derived piRNAs in Bombyx germ cells.  
367 *Nucleic acids research* 45(15):9108-9120.
- 368 8. Zhang D, *et al.* (2018) The piRNA targeting rules and the resistance to piRNA silencing in  
369 endogenous genes. *Science (New York, N.Y.)* 359(6375):587-592.
- 370 9. John B, *et al.* (2004) Human MicroRNA targets. *PLoS biology* 2(11):e363.
- 371 10. Anonymous (2016) Trends in adult body-mass index in 200 countries from 1975 to 2014: a pooled  
372 analysis of 1698 population-based measurement studies with 19.2 million participants. *Lancet*  
373 *(London, England)* 387(10026):1377-1396.
